# Supplementary material for: Structural Characterization and Rheological and Antioxidant Properties of Novel Polysaccharide from Calcareous Red Seaweed
Source: MDPI journal article supplement (doi:10.3390/md20090546), 2022-08-25
Supplement: s1 [file s1]

## Supplementary Data

Figure

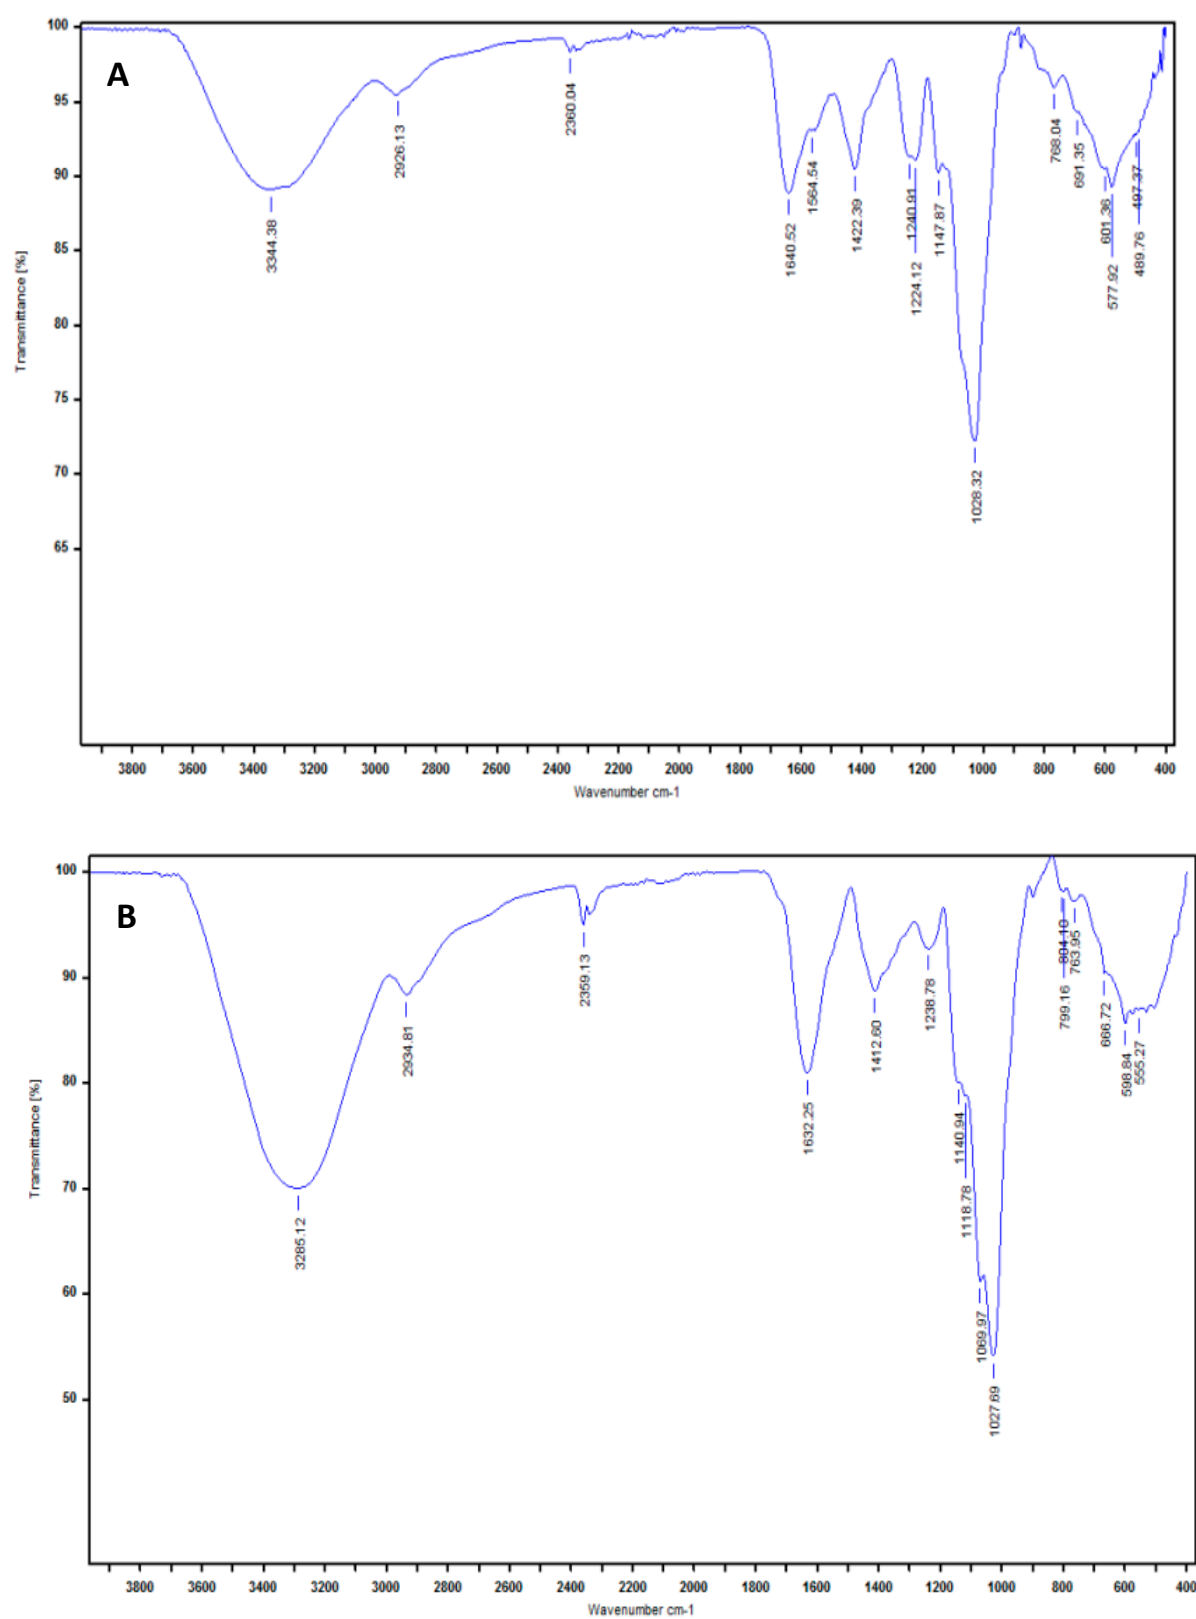

**Figure S1.** FT-IR spectra of **(A)** JASX (sulfated fraction) and **(B)** JADX (desulfated fraction).

## Table

**Table S1.** Power-law model fitting viscoelastic parameters for JASX (1.0-2.0%,  $w/v$ ) solutions in water.

| JASX<br>(%, $w/v$ ) | Power-law model fitting parameters |                   |                   |                   |        |         |
|---------------------|------------------------------------|-------------------|-------------------|-------------------|--------|---------|
|                     | $n'$                               | $n''$             | $k'$              | $k''$             | $R'^2$ | $R''^2$ |
| 1.0                 | $0.538 \pm 0.010$                  | $0.822 \pm 0.023$ | $0.729 \pm 0.017$ | $0.099 \pm 0.001$ | 0.99   | 0.97    |
| 2.0                 | $0.474 \pm 0.014$                  | $0.623 \pm 0.009$ | $2.703 \pm 0.031$ | $0.393 \pm 0.021$ | 0.95   | 0.99    |
